# Supplementary material for: Health risks in international container and bulk cargo transport due to volatile toxic compounds
Source: PubMed Central journal article supplement (PMC4465480; doi:10.1186/s12995-015-0059-4), 2015-05-20
Supplement: 12995_2015_59_MOESM1_ESM.pdf [file 12995_2015_59_MOESM1_ESM.pdf]

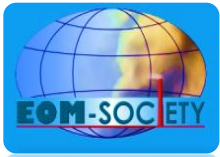

# Fum-Ex 2

## FUMIGANT EXPOSURE QUESTIONNAIRE

STUDY SITE (INSTITUTION) \_\_\_\_\_

CO-INVESTIGATOR \_\_\_\_\_

DATE OF EVALUATION \_\_\_/\_\_\_/\_\_\_\_\_

NAME-ACRONYM/or Nr. \_\_\_\_\_

DATE OF BIRTH \_\_\_/\_\_\_/\_\_\_\_\_ (MONTH/DAY/YEAR)      AGE \_\_\_ YEARS

SEX F\_\_\_ M\_\_\_

HEIGHT (cm) \_\_\_\_\_

WEIGHT (kg) \_\_\_\_\_

CURRENT SMOKER: YES \_\_\_ NO \_\_\_ NEVER SMOKED \_\_\_

EX-SMOKER: YES \_\_\_ NO \_\_\_

DATE QUIT: \_\_\_/\_\_\_/\_\_\_\_\_ (MONTH/DAY/YEAR)

SMOKING HISTORY IN # OF PACK YEARS: \_\_\_ PACK-YEARS

### OCCUPATIONAL HISTORY

1. JOB DESCRIPTION \_\_\_\_\_

\_\_\_\_\_

2. SINCE WHEN ARE YOU WORKING IN YOUR CURRENT JOB?

\_\_\_ (M)/ \_\_\_ (Y)

3. DO YOU CURRENTLY WORK WITH FUMIGANTS, PESTICIDES OR OTHER CHEMICALS?

YES \_\_\_ NO \_\_\_

4. IF YES TO QUESTION # 3, SPECIFY: \_\_\_ Methyl bromide

\_\_\_ Ethylene dichloride

\_\_\_ Methylene chloride

\_\_\_ Phosphine

\_\_\_ (OTHER)

I. DURATION OF EXPOSURE IN TOTAL \_\_\_\_\_ (MONTHS)

II. HOW MANY HOURS DO YOU WORK WITH THE AGENTS MENTIONED ABOVE PER WEEK?

\_\_\_ HOURS

III. WHEN WAS THE LAST EXPOSURE? \_\_\_/\_\_\_/\_\_\_ (MONTH/DAY/YEAR)

IV. DURATION OF LAST EXPOSURE \_\_\_ (DAYS) \_\_\_ (HOURS) \_\_\_ (MINUTES)

5. IF NO (QUESTION # 3): DID YOU WORK WITH THESE AGENTS IN THE PAST?

YES \_\_\_ NO \_\_\_

WHICH AGENT? \_\_\_\_\_

WHAT WAS YOUR JOB DESCRIPTION AT THAT TIME? \_\_\_\_\_

EXPOSURE STARTED (DATE) \_\_\_/\_\_\_/\_\_\_ (MONTH/YEAR)

EXPOSURE ENDED (DATE) \_\_\_/\_\_\_/\_\_\_ (MONTH/YEAR)

6. WHILE WORKING DID YOU USE ANY PROTECTION EQUIPMENT? YES \_\_\_ NO \_\_\_

IF YES: WHICH? \_\_\_\_\_

7. Did YOU had contact to genotoxic agents?

YES \_\_\_ NO \_\_\_

WHICH AGENT? \_\_\_\_\_

8. Have YOU been exposed to ionizing radiation for dignostic purposes?

YES \_\_\_ NO \_\_\_

How long? \_\_\_\_\_

9. SYMPTOMS

HOW MANY TIMES DID THE FOLLOWING SYMPTOMS OCCUR DURING THE LAST 12 MONTHS?

| SYMPTOMS/INCIDENCE                        | ALMOST ALWAYS | OFTEN | SPORADIC | ALMOST NEVER | NEVER | WHEN DID IT OCCURE FOR THE FIRST TIME? (M/D/Y) | WAS IT WORK-RELATED? YES/NO |
|-------------------------------------------|---------------|-------|----------|--------------|-------|------------------------------------------------|-----------------------------|
| HEADACHE                                  | _             | _     | _        | _            | _     | _ / _ / _                                      |                             |
| CHEST TIGHTNESS, DYSPNEA                  | _             | _     | _        | _            | _     | _ / _ / _                                      |                             |
| AIRWAYS IRRITATION, COUGH                 | _             | _     | _        | _            | _     | _ / _ / _                                      |                             |
| MUCOSA IRRITATIONS (RHINITIS, STOMATITIS) | _             | _     | _        | _            | _     | _ / _ / _                                      |                             |
| EYE IRRITATION, CONJUNCTIVITIS            | _             | _     | _        | _            | _     | _ / _ / _                                      |                             |
| NAUSEA                                    | _             | _     | _        | _            | _     | _ / _ / _                                      |                             |
| DIZZINESS                                 | _             | _     | _        | _            | _     | _ / _ / _                                      |                             |
| MUSCLE CRAMPS                             | _             | _     | _        | _            | _     | _ / _ / _                                      |                             |
| CONCENTRATION DISORDERS                   | _             | _     | _        | _            | _     | _ / _ / _                                      |                             |
| DYSGEUSIA                                 | _             | _     | _        | _            | _     | _ / _ / _                                      |                             |
| NUMBNESS                                  | _             | _     | _        | _            | _     | _ / _ / _                                      |                             |
| DIARRHEA, ABDOMINAL CRAMPS                | _             | _     | _        | _            | _     | _ / _ / _                                      |                             |
| WEAKNESS, FATIGUE                         | _             | _     | _        | _            | _     | _ / _ / _                                      |                             |
| SEIZURES                                  | _             | _     | _        | _            | _     | _ / _ / _                                      |                             |
| DISTURBANCE OF                            |               |       |          |              |       | _ / _ / _                                      |                             |

|                                  |                          |                          |                          |                          |                          |                                                |                             |
|----------------------------------|--------------------------|--------------------------|--------------------------|--------------------------|--------------------------|------------------------------------------------|-----------------------------|
| DISTURBANCE OF MEMORY            | <input type="checkbox"/> | <input type="checkbox"/> | <input type="checkbox"/> | <input type="checkbox"/> | <input type="checkbox"/> | ___/___/___                                    |                             |
| SYMPTOMS/INCIDENCE               | ALMOST ALWAYS            | OFTEN                    | SPORADIC                 | ALMOST NEVER             | NEVER                    | WHEN DID IT OCCURE FOR THE FIRST TIME? (M/D/Y) | WAS IT WORK-RELATED? YES/NO |
| EMOTIONAL INSTABILITY            | <input type="checkbox"/> | <input type="checkbox"/> | <input type="checkbox"/> | <input type="checkbox"/> | <input type="checkbox"/> | ___/___/___                                    |                             |
| SADNESS, DEPRESSION              | <input type="checkbox"/> | <input type="checkbox"/> | <input type="checkbox"/> | <input type="checkbox"/> | <input type="checkbox"/> | ___/___/___                                    |                             |
| SLEEP DISORDER                   | <input type="checkbox"/> | <input type="checkbox"/> | <input type="checkbox"/> | <input type="checkbox"/> | <input type="checkbox"/> | ___/___/___                                    |                             |
| IMPAIRED BALANCE, DISTURBED GAIT | <input type="checkbox"/> | <input type="checkbox"/> | <input type="checkbox"/> | <input type="checkbox"/> | <input type="checkbox"/> | ___/___/___                                    |                             |
| TREMOR                           | <input type="checkbox"/> | <input type="checkbox"/> | <input type="checkbox"/> | <input type="checkbox"/> | <input type="checkbox"/> | ___/___/___                                    |                             |
| OTHER, PLEASE SPECIFY<br>_____   | <input type="checkbox"/> | <input type="checkbox"/> | <input type="checkbox"/> | <input type="checkbox"/> | <input type="checkbox"/> | ___/___/___                                    |                             |

10. HAVE YOU EVER BEEN UNCONSCIOUS IN THE LAST YEARS? YES \_\_\_ NO \_\_\_

11. IF YES (QUESTION #10): DID IT HAPPEN AT YOUR WORKPLACE? YES \_\_\_ NO \_\_\_

12. PLEASE INDICATE BELOW WHICH CHRONIC OR ACUTE CONDITION(S) YOU HAVE:

ARTHRITIS, SPECIFY \_\_\_\_\_

RHEUMATIC DISEASE, SPECIFY \_\_\_\_\_

ASTHMA, SPECIFY \_\_\_\_\_

CHRONIC BRONCHITIS \_\_\_\_\_

CANCER, SPECIFY \_\_\_\_\_

DIABETES, SPECIFY \_\_\_\_\_

KIDNEY DISEASE, SPECIFY \_\_\_\_\_

LIVER DISEASE, SPECIFY \_\_\_\_\_

CENTRAL/PERIPHERAL NERVOUS SYSTEM DISEASE, SPECIFY \_\_\_\_\_

OTHER CHRONIC CONDITION, SPECIFY \_\_\_\_\_

13. ARE YOU CURRENTLY TAKING ANY MEDICATION? YES \_\_\_ NO \_\_\_

IF YES, SPECIFY: \_\_\_\_\_

14. DID YOU HAD CONTACT TO GENOTOXIC AGENTS?

YES \_\_\_ NO \_\_\_

WHICH AGENT? \_\_\_\_\_

WHEN? \_\_\_\_\_

15. HAVE YOU BEEN EXPOSED TO IONIZING RADIATION FOR DIGNOSTICOR THERAPEUTIC PURPOSES?

YES \_\_\_ NO \_\_\_

WHEN? \_\_\_\_\_

HOW LONG? \_\_\_\_\_

**16. DIET**

**MEAT**

**HOW MANY TIMES PER WEEK?** \_\_\_\_\_

**VEGETABLES**

**HOW MANY TIMES PER WEEK?** \_\_\_\_\_

**FRUITS**

**HOW MANY TIMES PER WEEK?** \_\_\_\_\_

**ALCOHOL CONSUMPTION**

**WINE** \_\_\_\_\_ **BEER** \_\_\_\_\_ **HIGH% SPIRITS** \_\_\_\_\_

**HOW MANY TIMES PER WEEK?** \_\_\_\_\_

**17. ADDITIONAL INFORMATION IF NEEDED:** \_\_\_\_\_

\_\_\_\_\_

\_\_\_\_\_

**THANK YOU VERY MUCH FOR YOUR COOPERATION!**

see also :

[http://www.eomsociety.org/attachments/FUM-EX%20\\_%20QUESTIONNAIRE\\_EOM%20FRENCH%20VERSION.pdf](http://www.eomsociety.org/attachments/FUM-EX%20_%20QUESTIONNAIRE_EOM%20FRENCH%20VERSION.pdf)

for the French Version of the Questionnair
