# Supplementary material for: Health risks in international container and bulk cargo transport due to volatile toxic compounds
Source: Springer Nature journal article supplement (doi:10.1186/s12995-015-0059-4), 2015-05-19
Supplement: MOESM2 [file 9771314]

**Incidents with fumigants/ or toxic industrial chemicals.** Intoxication cases (1993-2013)

| R | Exposure           |                       |                    | Main Complaints                                                                                                                                      | Diagnosis                                                                                                                                                                                                         |
|---|--------------------|-----------------------|--------------------|------------------------------------------------------------------------------------------------------------------------------------------------------|-------------------------------------------------------------------------------------------------------------------------------------------------------------------------------------------------------------------|
|   | Substance          | Activity              | Period             |                                                                                                                                                      |                                                                                                                                                                                                                   |
| 1 | 1,2-Dichloroethane | Unloading a Container | 4 - 5 hours        | Headache, vertigo, nausea, dyspnoea, pruritus, loss of strength in left hand                                                                         | <ul style="list-style-type: none"> <li>•Intoxication with fumigants</li> <li>•Pulmonary obstruction and bronchial hyperresponsivness (RADS)</li> <li>•Persistent neurological deficiencies</li> </ul>             |
| 2 | 1,2-Dichloroethane | Unloading a Container | Ca. 6 hours        | Headache, vertigo, nausea, dyspnoea, visual disturbances, metallic taste, chest pain                                                                 | <ul style="list-style-type: none"> <li>•Intoxication with fumigants</li> <li>•Pulmonary obstruction and bronchial hyperresponsivness (RADS)</li> </ul>                                                            |
| 3 | 1,2-Dichloroethane | Unloading a Container | Ca. 4 + 2 hours    | Headache, vertigo, nausea, dyspnoea, burning skin sensation, metallic taste, furred tongue, attacks of sweating                                      | Intoxication with fumigants                                                                                                                                                                                       |
| 4 | 1,2-Dichloroethane | Unloading a Container | Approx. 4 hours    | Headache, nausea, furred tongue, dry mouth, sleep disorder, bloated feeling, flatulence                                                              | Intoxication with fumigants                                                                                                                                                                                       |
| 5 | 1,2-Dichloroethane | Unloading a Container | Approx. 10 minutes | Headache, dizziness, nausea, burning skin sensation, furred tongue, burning sensation and numbness of the lips                                       | <ul style="list-style-type: none"> <li>•Intoxication with fumigants</li> <li>•Bronchial hyperresponsivness</li> <li>•Intermittent atrial fibrillation and absolute arrhythmia</li> <li>•Hyperlipidemia</li> </ul> |
| 6 | Phosphine          | Storage room          | Ca. 30 minutes     | Headache, lassitude, nervousness, airway irritation, cough, burning of facial skin, itching conjunctivitis, taste disorder, anaesthesia of left hand | <ul style="list-style-type: none"> <li>•Phosphine intoxication</li> <li>•Persistent polyneuropathy</li> <li>•Persistent cerebral dysfunction</li> <li>•Bronchial hyperresponsivness</li> </ul>                    |

**Note :** the table is not complete, since many cases are not published, the dark numbers reported to the insurances cannot be estimated (data is not available). In each case mostly several persons were intoxicated, the exact number of exposed persons were not always provided, however.

**Incidents with fumigants/ or toxic industrial chemicals.** Intoxication cases (1993-2013)

|    |                    |                                     |              |                                                                                                                                          |                                                                                                                                                                                                  |
|----|--------------------|-------------------------------------|--------------|------------------------------------------------------------------------------------------------------------------------------------------|--------------------------------------------------------------------------------------------------------------------------------------------------------------------------------------------------|
| 7  | 1,2-Dichloroethane | Warehouse (Storing textiles)        | 2 years      | Headache, vertigo, nausea, dyspnoea, impaired fitness, disturbance of concentration and memory, nasal and oral complaints                | <ul style="list-style-type: none"> <li>• Intoxication with fumigants</li> <li>• Persistent cerebral dysfunction</li> <li>• Bronchial hyperresponsiveness</li> </ul>                              |
| 8  | 1,2-Dichloroethane | Storing textiles in a warehouse     | 10 years     | Headache, vertigo, nausea, dyspnoea, motoric disorder, rhinorrhoea, tightness in the chest                                               | <ul style="list-style-type: none"> <li>• Intoxication with fumigants</li> <li>• Persistent disturbance of memory and concentration disorders</li> <li>• Bronchial hyperresponsiveness</li> </ul> |
| 9  | 1,2-Dichloroethane | Cleaning warehouse                  | 4 years      | Headache, cognitive disorder, disturbance of concentration, emotional instability, airways irritation and cough                          | <ul style="list-style-type: none"> <li>• Intoxication with fumigants</li> <li>• Type-I-sensitisation versus tree and weed</li> </ul>                                                             |
| 10 | unknown            | Container inspection                | some minutes | Headache, vertigo, nausea, dyspnoea, visual disturbances, disturbance of memory and concentration disorders                              | <ul style="list-style-type: none"> <li>• Intoxication with fumigants</li> </ul>                                                                                                                  |
| 11 | Methyl bromide     | Unloading Container                 | 5-6 minutes  | Headache, dyspnoea, cough, pruritus, repetitive epistaxis, reduced fitness, fatigue, muscle cramps, concentration disorders, nervousness | <ul style="list-style-type: none"> <li>• Intoxication with fumigants</li> <li>• Bronchial hyperresponsiveness</li> </ul>                                                                         |
| 12 | unknown            | Storing textiles in a warehouse     | 4 years      | Dyspnoea, cough, red and watering eyes, runny nose, sneezing, temperature, exhaustion                                                    | <ul style="list-style-type: none"> <li>• Intoxication with fumigants</li> <li>• Type-I-sensitisation versus cats, dogs, weeds, goats and guinea-pigs</li> </ul>                                  |
| 13 | Methyl bromide     | Loading and Unloading of Containers | 8 years      | Dyspnoea, vertigo, metal taste, red and itching eyes, abdominal pain                                                                     | <ul style="list-style-type: none"> <li>• Intoxication with fumigants</li> </ul>                                                                                                                  |

**Note :** the table is not complete, since many cases are not published, the dark numbers reported to the insurances cannot be estimated (data is not available). In each case mostly several persons were intoxicated, the exact number of exposed persons were not always provided, however.

**Incidents with fumigants/ or toxic industrial chemicals.** Intoxication cases (1993-2013)

|    |                                       |                                                                 |         |                                                                                                                                                                                                         |                                                                                                                           |
|----|---------------------------------------|-----------------------------------------------------------------|---------|---------------------------------------------------------------------------------------------------------------------------------------------------------------------------------------------------------|---------------------------------------------------------------------------------------------------------------------------|
| 14 | Methyl bromide, Phosphine             | Unloading Containers, Storing goods (warehouse)                 | 9 years | Headache, retinal bleeding, impaired vision                                                                                                                                                             | <ul style="list-style-type: none"> <li>•Methyl bromide intoxication</li> <li>•Phosphine intoxication</li> </ul>           |
| 15 | Dichloromethane                       | Moving own furniture via Container from South America to Europe | weeks   | Headache, dizziness, irascibility, bitter taste, burning nose, tongue and airways, cough, cognitive disorder, disturbance of concentration, anomic aphasia,, fatigue , muscle cramps and aching muscles | <ul style="list-style-type: none"> <li>•Dichloromethane intoxication</li> </ul>                                           |
| 16 | Methyl bromide                        | Unloading of containers                                         | 1 year  | Headache, mucosa and skin irritations, nausea, dizziness, concentration disorders, fatigue, slurred speech, muscle cramps                                                                               | <ul style="list-style-type: none"> <li>•Intoxication with methyl bromide</li> <li>•Prostate carcinoma</li> </ul>          |
| 17 | Methylene chloride<br>Dichloromethane | Ironing imported textiles                                       | 2 years | Airways irritation, cough, chest tightness, dyspnea                                                                                                                                                     | <ul style="list-style-type: none"> <li>•Methylene chloride intoxication</li> <li>•Bronchial hyperresponsivness</li> </ul> |
| 18 | unknown                               | Container inspection                                            | 1 hour  | Headache, nausea, dizziness, irritation of hand and facial skin, airways irritation                                                                                                                     | <ul style="list-style-type: none"> <li>•Intoxication with fumigants</li> <li>•Headache, Nausea, Dizziness</li> </ul>      |
| 19 | Methylene chloride                    | Ironing imported textiles, Storing textiles                     | 2 years | Dizziness, weakness, fatigue, chronic fatigue and reduced physical capacity                                                                                                                             | <ul style="list-style-type: none"> <li>•Methylene chloride intoxication</li> <li>•Bronchial hyperresponsivness</li> </ul> |

**Note :** the table is not complete, since many cases are not published, the dark numbers reported to the insurances cannot be estimated (data is not available). In each case mostly several persons were intoxicated, the exact number of exposed persons were not always provided, however.

**Incidents with fumigants/ or toxic industrial chemicals.** Intoxication cases (1993-2013)

|    |                |                         |          |                                                                                                                                                                                                                                                            |                                                                                                                                |
|----|----------------|-------------------------|----------|------------------------------------------------------------------------------------------------------------------------------------------------------------------------------------------------------------------------------------------------------------|--------------------------------------------------------------------------------------------------------------------------------|
| 20 | Phosphine      | Container inspection    | 1 day    | Headache, airways irritation and dyspnea, cough, nausea, dizziness, concentration disorders and disturbance of memory, chronic fatigue and/or reduced physical capacity, emotional instability, muscle cramps, slurred speech, parasthesia, sleep disorder | <ul style="list-style-type: none"> <li>• Phosphine intoxication</li> <li>• Bronchial hyperresponsivness (RADS)</li> </ul>      |
| 21 | Methyl bromide | Unloading of containers | 2 years  | Headache, airways irritation, mucosa irritations, dizziness, emotional instability, muscle cramps                                                                                                                                                          | <ul style="list-style-type: none"> <li>• Methyl bromide intoxication</li> <li>• Bronchial hyperresponsivness (RADS)</li> </ul> |
| 22 | Methyl bromide | Unloading of containers | 3 years  | Headache, nausea, dizziness, dysgeusia                                                                                                                                                                                                                     | <ul style="list-style-type: none"> <li>• Methyl bromide intoxication</li> </ul>                                                |
| 23 | Methyl bromide | Unloading of containers | 2 years  | Headache, airways irritation and cough, chest tightness, dyspnea, skin irritation, muscle cramps, chronic fatigue and/or reduced physical capacity, emotional instability, dysgeusia                                                                       | <ul style="list-style-type: none"> <li>• Methyl bromide intoxication</li> <li>• Bronchial hyperresponsivness</li> </ul>        |
| 24 | Methyl bromide | Unloading of containers | 6 months | Headache, airways irritation, mucosa irritation, disturbance of memory, concentration disorders, chronic fatigue and/or reduced physical capacity, emotional instability                                                                                   | <ul style="list-style-type: none"> <li>• Methyl bromide intoxication</li> </ul>                                                |

**Note :** the table is not complete, since many cases are not published, the dark numbers reported to the insurances cannot be estimated (data is not available). In each case mostly several persons were intoxicated, the exact number of exposed persons were not always provided, however.

**Incidents with fumigants/ or toxic industrial chemicals.** Intoxication cases (1993-2013)

|    |                    |                         |          |                                                                                                                                                                                                                                                                                       |                                  |
|----|--------------------|-------------------------|----------|---------------------------------------------------------------------------------------------------------------------------------------------------------------------------------------------------------------------------------------------------------------------------------------|----------------------------------|
| 25 | Methyl bromide     | Unloading of containers | 1 year   | Headache, mucosa irritation, concentration disorders, disturbance of memory, chronic fatigue and/or reduced physical capacity                                                                                                                                                         | •Methyl bromide intoxication     |
| 26 | Phosphine          | Unloading of containers | 2 months | Headache, airways irritation, cough, skin irritations, nausea, dizziness, muscle cramps, diarrhea, abd. cramps                                                                                                                                                                        | •Phosphine intoxication          |
| 27 | Phosphine          | Unloading of containers | 4 years  | Headache, airways irritations, cough, mucosa irritations, nausea, muscle cramps, diarrhea, abd. cramps, chronic fatigue and/or reduced physical capacity, dizziness                                                                                                                   | •Phosphine intoxication          |
| 28 | Methyl bromide     | Unloading of containers | 1 day    | Headache, airways irritations, cough, skin and mucosa irritations, nausea, dizziness                                                                                                                                                                                                  | •Methyl bromide intoxication     |
| 29 | Methyl bromide     | Unloading of containers | 1 day    | Skin and mucosa irritations, dizziness, muscle cramps, concentration disorders, dysgeusia, numbness, seizures, disturbance of memory, chronic fatigue and/or reduced physical capacity, chest tightness, dyspnea, emotional instability, slurred speech, paraesthesia, sleep disorder | •Methyl bromide intoxication     |
| 30 | 1,2-Dichloroethane | Logistic company        |          | Disturbance of consciousness, rapid breathing, convulsions                                                                                                                                                                                                                            | •1,2-Dichloroethane intoxication |

**Note :** the table is not complete, since many cases are not published, the dark numbers reported to the insurances cannot be estimated (data is not available). In each case mostly several persons were intoxicated, the exact number of exposed persons were not always provided, however.

**Incidents with fumigants/ or toxic industrial chemicals.** Intoxication cases (1993-2013)

|    |                                                                     |                                                                    |               |                                                                                                                                                                          |                                                |
|----|---------------------------------------------------------------------|--------------------------------------------------------------------|---------------|--------------------------------------------------------------------------------------------------------------------------------------------------------------------------|------------------------------------------------|
| 31 | Dichloromethane, 1,1,1-trichloroethane, toluene, ethyl acetate, MEK | Adhesive work                                                      |               | Decrease of muscle strength, muscle atrophy in the hands                                                                                                                 | •Chronic polyneuropathy due to dichloromethane |
| 32 | Methyl bromide                                                      | Fumigation                                                         | 1 hour        | Dizziness, fatigue, nausea and vomiting, chest pain, dyspnoea, ataxia, general convulsions, anuria                                                                       | •Methyl bromide intoxication                   |
| 33 | Methyl bromide                                                      | Fumigation of grain store                                          | 1 hour        | Dizziness, fatigue, nausea and vomiting, chest pain, dyspnoea                                                                                                            | •Methyl bromide intoxication                   |
| 34 | Methyl bromide                                                      | fumigated house                                                    | 1 day         | Headache, status epilepticus, hypoglycaemia, rhabdomyolysis, heart with areas of oedema and focal haemorrhage, severe lung oedema, bilateral hippocampal necrosis, death | •Methyl bromide intoxication                   |
| 35 | Methyl bromide                                                      | Working in warehouse of imported and fumigated fruit and vegetable | Several hours | Paresthesia in the feet, unstable gait, blepharoptosis, pharyngeal pain,                                                                                                 | •Methyl bromide intoxication                   |
| 36 | Methyl bromide                                                      | Fumigation                                                         | 9 hours       | Feeling sick                                                                                                                                                             | •Methyl bromide intoxication                   |
| 37 | Methyl bromide                                                      | Fumigation                                                         | 30 hours      | Impaired consciousness, convulsions                                                                                                                                      | •Methyl bromide intoxication                   |
| 38 | Methyl bromide                                                      | Fumigation                                                         | 30 Hours      | Impaired consciousness, convulsions                                                                                                                                      | •Methyl bromide intoxication                   |

**Note :** the table is not complete, since many cases are not published, the dark numbers reported to the insurances cannot be estimated (data is not available). In each case mostly several persons were intoxicated, the exact number of exposed persons were not always provided, however.

**Incidents with fumigants/ or toxic industrial chemicals.** Intoxication cases (1993-2013)

|    |                |                                                           |               |                                                                              |                                            |
|----|----------------|-----------------------------------------------------------|---------------|------------------------------------------------------------------------------|--------------------------------------------|
| 39 | Phosphine      | Fumigation at sea                                         | Hours - Days? | Death                                                                        | •Phosphine intoxication                    |
| 40 | Phosphine      | Aluminium phosphide manufacturing                         | Hours         | Chest pain, dyspnoea, dizziness, nausea and vomiting                         | •Phosphine intoxication                    |
| 41 | Methyl Bromide | Cleaning a grain silo                                     | Minutes       | Impaired consciousness, death the same night                                 | •Methyl bromide intoxication               |
| 42 | unknown        | Opening ship's hold after fumigation of lumber            | Minutes       | Death                                                                        | •Fumigant intoxication<br>•Anoxia          |
| 43 | unknown        | Ship's inspection                                         | Minutes       | Death                                                                        | •Fumigant intoxication                     |
| 44 | Phosphine      | Transportation of fumigated cargo on ship                 | Several Days  | Death (2 cases)                                                              | •Death by Phosphine intoxication (2 cases) |
| 45 | Phosphine      | Transportation of fumigated cargo on ship                 | Several Days  | 6 „poisoned“ seafarers                                                       | •6 cases of Phosphine intoxication         |
| 46 | Phosphine      | Grain fumigation on board                                 | Several Days  | Group of ship's crew „poisoned“                                              | •Group Phosphine intoxication              |
| 47 | Phosphine      | Stowaway in Ship's hold with fumigated cargo              | 49 Hours      | When found: unconscious, weak pulse, CPR necessary. 45 minutes later: dead   | •Death due to Phosphine Intoxication       |
| 48 | Phosphine      | fumigated cargo                                           | 2 days        | „poisoned“                                                                   | •Phosphine Intoxication                    |
| 49 | Phosphine      | Investigation of clandestine methamphetamine laboratories | 20-30 Minutes | Initially: Dizziness, dry cough, headache, diarrhea<br>Persistent: dry cough | •Phosphine Intoxication                    |

**Note :** the table is not complete, since many cases are not published, the dark numbers reported to the insurances cannot be estimated (data is not available). In each case mostly several persons were intoxicated, the exact number of exposed persons were not always provided, however.

**Incidents with fumigants/ or toxic industrial chemicals.** Intoxication cases (1993-2013)

|    |                                |                                                                                                    |               |                                                                                                                                                                                             |                                                       |
|----|--------------------------------|----------------------------------------------------------------------------------------------------|---------------|---------------------------------------------------------------------------------------------------------------------------------------------------------------------------------------------|-------------------------------------------------------|
| 50 | Methyl bromide,                | Fumigation of a museum                                                                             | 28-30 Hours   | Feeling sick after about 10-12 hours of exposure, dead after 28-30 hours of exposure                                                                                                        | • Intoxication with methyl bromide                    |
| 51 | Ethylene oxide                 | Fumigation of a museum                                                                             | several hours | Tremors of the hand, later myoclonus, coma, generalized myoclonic convulsions<br>Persistent: mild tremor and intention tremor of right hand                                                 | • Intoxication with ethylene oxide                    |
| 52 | Methyl bromide, ethylene oxide | Fumigation of products (inhalation of gas when removing seal of cylinder without wearing gas mask) | Seconds       | Initially: mild nausea and vomiting. After 3 days dizziness, light-headedness, allophasia, abasia, decreased muscle strength in upper and lower extremities, glove and stocking anaesthesia | • Intoxication with methyl bromide and ethylene oxide |
| 53 | Sulfuryl Fluoride              | Fumigation of condominium                                                                          | Several Hours | Death                                                                                                                                                                                       | • Death due to sulfuryl fluoride intoxication         |
| 54 | Methyl bromide                 | Unpacking of import goods in a storage room                                                        | several hrs   | mucosal, skin, and eye irritation, once bleeding nose , neurological symptoms (nausea, headache)                                                                                            | • Intoxication with methyl bromide                    |
| 55 | Ethylene oxide                 | Unpacking of import goods in a storage room                                                        | several hrs   | mucosal, skin, and eye irritation, once bleeding nose , neurological symptoms (nausea, headache)                                                                                            | • Intoxication with ethylene oxide                    |

**Note :** the table is not complete, since many cases are not published, the dark numbers reported to the insurances cannot be estimated (data is not available). In each case mostly several persons were intoxicated, the exact number of exposed persons were not always provided, however.
